# Supplementary material for: Acid responsiveness of emissive morpholinyl aminoquinolines and their use for cell fluorescence imaging
Source: Royal Society of Chemistry journal article supplement (doi:10.1039/d2ob00546h), 2022-01-01

## Supporting Information

### Acid Responsiveness of Emissive Morpholinyl Aminoquinolines and Their Use for Cell Fluorescence Imaging

Yuri Fukumoto,<sup>#</sup> Tomohiro Umeno,<sup>#</sup> Hina Kuramochi, Koichi Hamada, Shota Matsumoto, Noriko Suzuki, Kazuteru Usui, Akihiro Mizutani, and Satoru Karasawa\*

Faculty of Pharmaceutical Sciences, Showa Pharmaceutical University, 3-3165 Higashi-Tamagawagakuen, Machida, Tokyo 194-8543, Japan.

<sup>#</sup>Y. F. and T. U. contributed equally

\*Corresponding author: Satoru Karasawa (S. K.)

E-mail: [karasawa@ac.shoyaku.ac.jp](mailto:karasawa@ac.shoyaku.ac.jp)

TEL: +81-42-721-1553

FAX: +81-42-721-1554

## Table of Contents

|                                                                                    |         |
|------------------------------------------------------------------------------------|---------|
| 1. Crystallographic and structural refinement parameters                           | S3–S4   |
| 2. Crystal structures                                                              | S5      |
| 3. Absorption and fluorescence spectra of <b>4</b>                                 | S6      |
| 4. Fluorescence spectral changes in DMSO/phosphate buffer conditions of <b>1–5</b> | S7–S8   |
| 5. Spectral change in chloroform upon addition of TFA to <b>1–5</b>                | S9–S10  |
| 6. Fluorescence imaging of cells treated with <b>1–5</b>                           | S11–S15 |
| 7. IR spectra of <b>1–5</b>                                                        | S16     |
| 8. <sup>1</sup> H- and <sup>13</sup> C-NMR spectra of <b>1–5</b>                   | S17–S21 |

**Table S1.** Selected Structural and Refinement Parameters for **1** and **3**.

|                                                                               | <b>1</b>                                                        | <b>3</b>                                                                     |
|-------------------------------------------------------------------------------|-----------------------------------------------------------------|------------------------------------------------------------------------------|
| Empirical formula                                                             | C <sub>17</sub> H <sub>17</sub> F <sub>6</sub> N <sub>3</sub> O | C <sub>23</sub> H <sub>28</sub> F <sub>6</sub> N <sub>4</sub> O <sub>2</sub> |
| Formula weight                                                                | 393.33                                                          | 505.48                                                                       |
| Crystal dimensions                                                            | 0.2 × 0.1 × 0.1 mm                                              | 0.2 × 0.1 × 0.1 mm                                                           |
| Crystal system                                                                | monoclinic                                                      | monoclinic                                                                   |
| Space group                                                                   | <i>P</i> 2 <sub>1</sub> / <i>c</i> (#14)                        | <i>P</i> 2 <sub>1</sub> / <i>c</i> (#14)                                     |
| <i>a</i> /Å                                                                   | 9.55670(10)                                                     | 5.5656(2)                                                                    |
| <i>b</i> /Å                                                                   | 18.5529(3)                                                      | 18.4733(5)                                                                   |
| <i>c</i> /Å                                                                   | 9.70230(10)                                                     | 22.5869(7)                                                                   |
| $\alpha$ /°                                                                   | 90                                                              | 90                                                                           |
| $\beta$ /°                                                                    | 91.6470(10)                                                     | 90.732(3)                                                                    |
| $\gamma$ /°                                                                   | 90                                                              | 90                                                                           |
| Volume/Å <sup>3</sup>                                                         | 1719.55(4)                                                      | 2322.08(13)                                                                  |
| <i>Z</i> ( <i>Z'</i> ) value                                                  | 4 (1)                                                           | 4 (1)                                                                        |
| Density (calc.)/g/cm <sup>3</sup>                                             | 1.512 g/cm <sup>3</sup>                                         | 1.449 g/cm <sup>3</sup>                                                      |
| <i>F</i> (000)                                                                | 808                                                             | 1052                                                                         |
| Residuals: <i>R</i> <sub>1</sub> ( <i>I</i> > 2.00σ( <i>I</i> )) <sup>a</sup> | 0.0385                                                          | 0.0681                                                                       |
| Residuals: <i>wR</i> <sub>2</sub> <sup>b</sup>                                | 0.1074                                                          | 0.1824                                                                       |
| GOF                                                                           | 1.063                                                           | 1.050                                                                        |
| Temperature                                                                   | 93 K                                                            | 93 K                                                                         |
| CCDC no.                                                                      | 2156333                                                         | 2156336                                                                      |

$$^a R_1 = \sum ||F_o| - |F_c|| / \sum |F_o|. \quad ^b wR_2 = [\sum (w(F_o^2 - F_c^2)^2) / \sum w(F_o^2)^2]^{1/2}$$

**Table S2.** Selected Structural and Refinement Parameters for **5** and **6**.

|                                                                               | <b>5</b>                                                          | <b>6</b>                                                          |
|-------------------------------------------------------------------------------|-------------------------------------------------------------------|-------------------------------------------------------------------|
| Empirical formula                                                             | C <sub>18</sub> H <sub>20</sub> F <sub>12</sub> N <sub>3</sub> OP | C <sub>19</sub> H <sub>22</sub> F <sub>12</sub> N <sub>3</sub> OP |
| Formula weight                                                                | 569.36                                                            | 567.36                                                            |
| Crystal dimensions                                                            | 0.1 × 0.1 × 0.1 mm                                                | 0.1 × 0.1 × 0.1 mm                                                |
| Crystal system                                                                | orthorhombic                                                      | triclinic                                                         |
| Space group                                                                   | <i>Pna</i> 2 <sub>1</sub> (#33)                                   | <i>P</i> -1 (#2)                                                  |
| <i>a</i> /Å                                                                   | 55.7279(19)                                                       | 6.1777(2)                                                         |
| <i>b</i> /Å                                                                   | 8.6632(2)                                                         | 8.8010(3)                                                         |
| <i>c</i> / Å                                                                  | 9.3599(3)                                                         | 22.3052(8)                                                        |
| $\alpha$ /°                                                                   | 90                                                                | 81.551(3)                                                         |
| $\beta$ /°                                                                    | 90                                                                | 85.313(3)                                                         |
| $\gamma$ /°                                                                   | 90                                                                | 80.624(3)                                                         |
| Volume/Å <sup>3</sup>                                                         | 4518.79                                                           | 1181.47(7)                                                        |
| <i>Z</i> ( <i>Z'</i> ) value                                                  | 8 (2)                                                             | 2 (1)                                                             |
| Density (calc.)/g/cm <sup>3</sup>                                             | 1.674 g/cm <sup>3</sup>                                           | 1.595 g/cm <sup>3</sup>                                           |
| <i>F</i> (000)                                                                | 2312                                                              | 576                                                               |
| Residuals: <i>R</i> <sub>1</sub> ( <i>I</i> > 2.00σ( <i>I</i> )) <sup>a</sup> | 0.0834                                                            | 0.0708                                                            |
| Residuals: <i>wR</i> <sub>2</sub> <sup>b</sup>                                | 0.2318                                                            | 0.1978                                                            |
| GOF                                                                           | 1.036                                                             | 1.044                                                             |
| Temperature                                                                   | 93 K                                                              | 93 K                                                              |
| CCDC no.                                                                      | 2156337                                                           | 2156358                                                           |

$$^a R_1 = \sum ||F_o| - |F_c|| / \sum |F_o|. \quad ^b wR_2 = [\sum (w(F_o^2 - F_c^2)^2) / \sum w(F_o^2)^2]^{1/2}$$

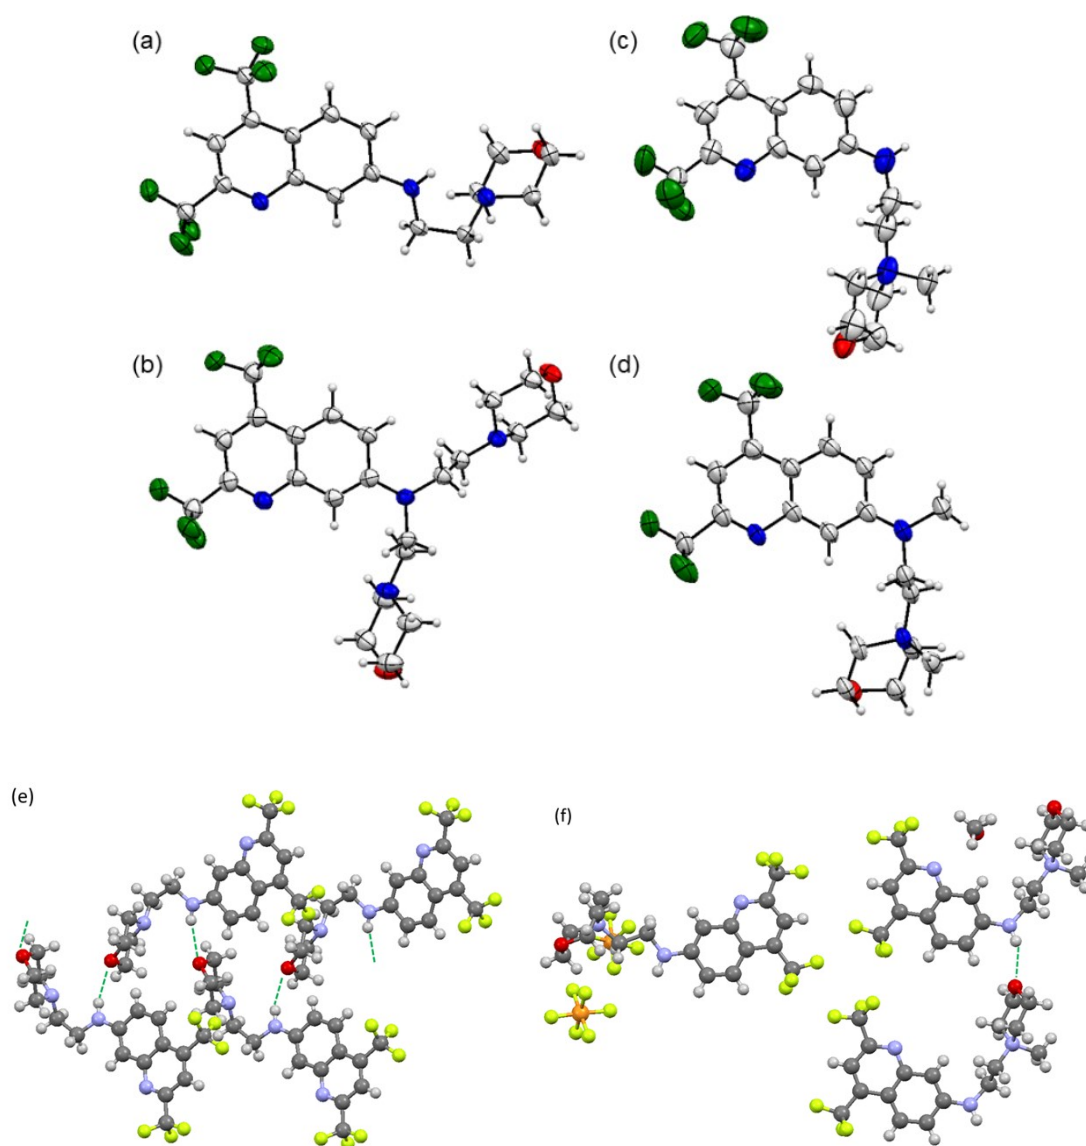

**Figure S1.** ORTEP-style drawings showing ellipsoids at 50% probability of compounds **1** (a), **3** (b), **5** (c), and **6** (d). Solvent molecules and  $\text{PF}_6^-$  counter anions are omitted for clarity. Gray, blue, red, and green atoms are C, N, O, and F, respectively. (e) Hydrogen-bonded chains formed between the nitrogen atom in the secondary amine and oxygen atoms in morpholine in compound **1**. Each hydrogen bond is 3.19 Å in length (green dotted lines). (f) Hydrogen bonds between the nitrogen atom in the secondary amine and oxygen atom in morpholine (one of two crystallographically independent molecules) in compound **5**. The hydrogen bond measures 3.13 Å (green dotted lines).

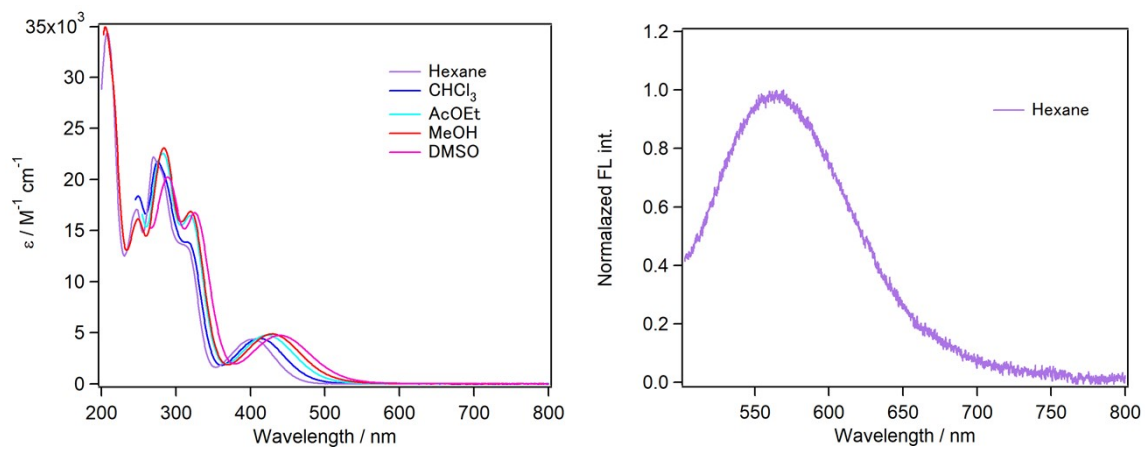

**Figure S2.** Absorption (left) and fluorescence (right) spectra of compound **4** in the given solvents. No fluorescence (very weak emissions) was observed in CHCl<sub>3</sub>, AcOEt, MeOH, or dimethylsulfoxide (DMSO) (see Table 2 in the main text).

### Compound 1

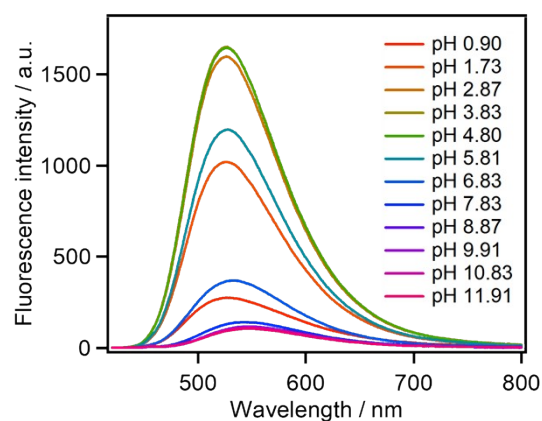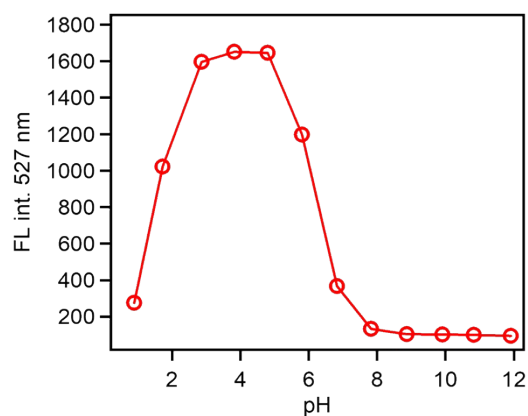

### Compound 2

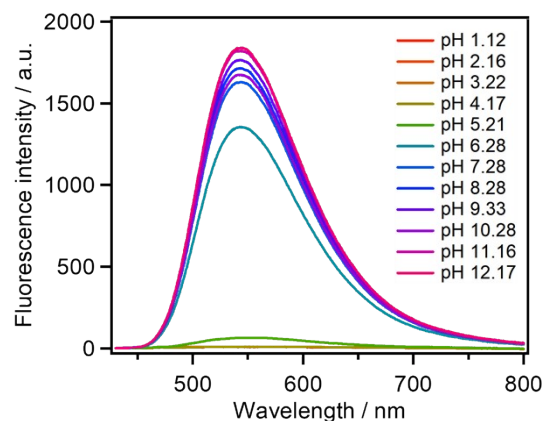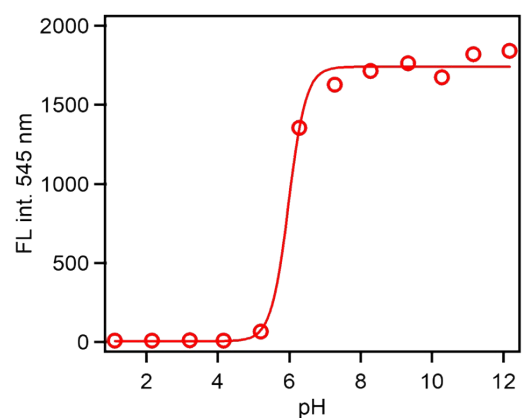

### Compound 3

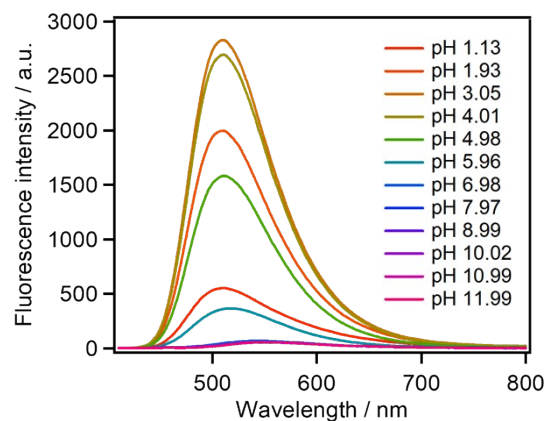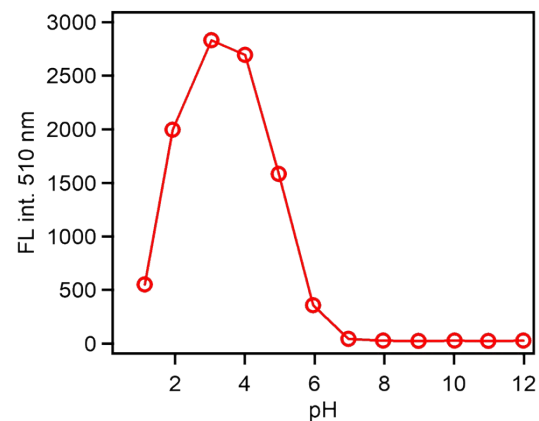

**Figure S3-1.** Emission spectral changes (left) of compounds 1–3 in 1% DMSO/phosphate buffer conditions (10% DMSO in compound 2). Right panels represent the emission intensity as a function of pH value.

### Compound 4

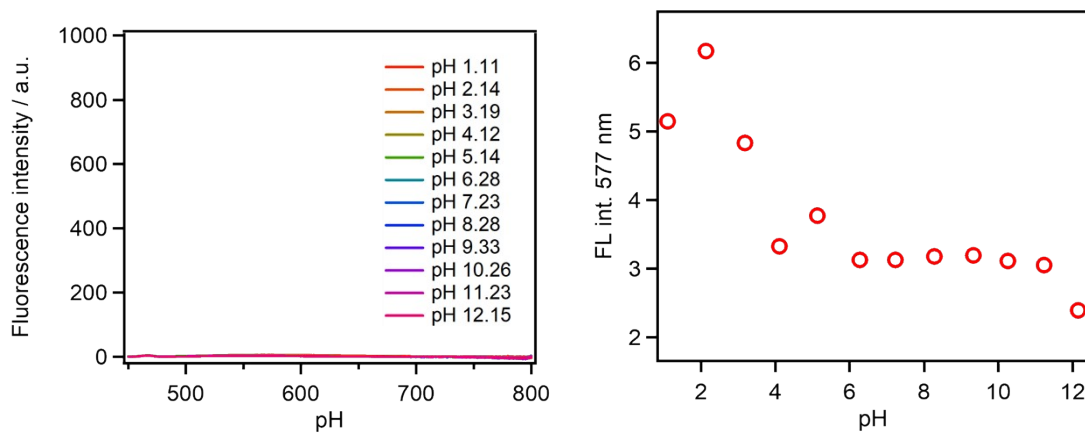

### Compound 5

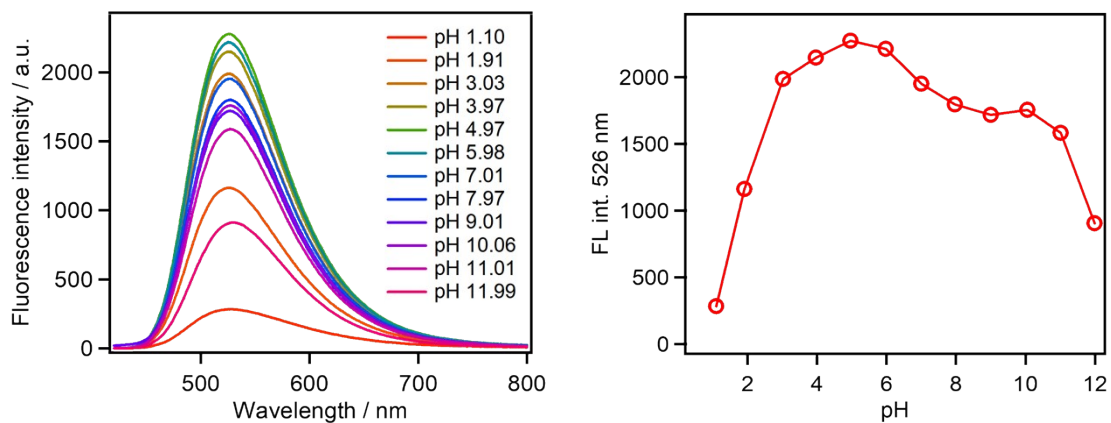

**Figure S3-2.** Emission spectral changes (left) of compounds **4** and **5** in 1% (compound **5**) or 10% (compound **4**) DMSO/phosphate buffer conditions. Right panels represent the emission intensity as a function of pH value.



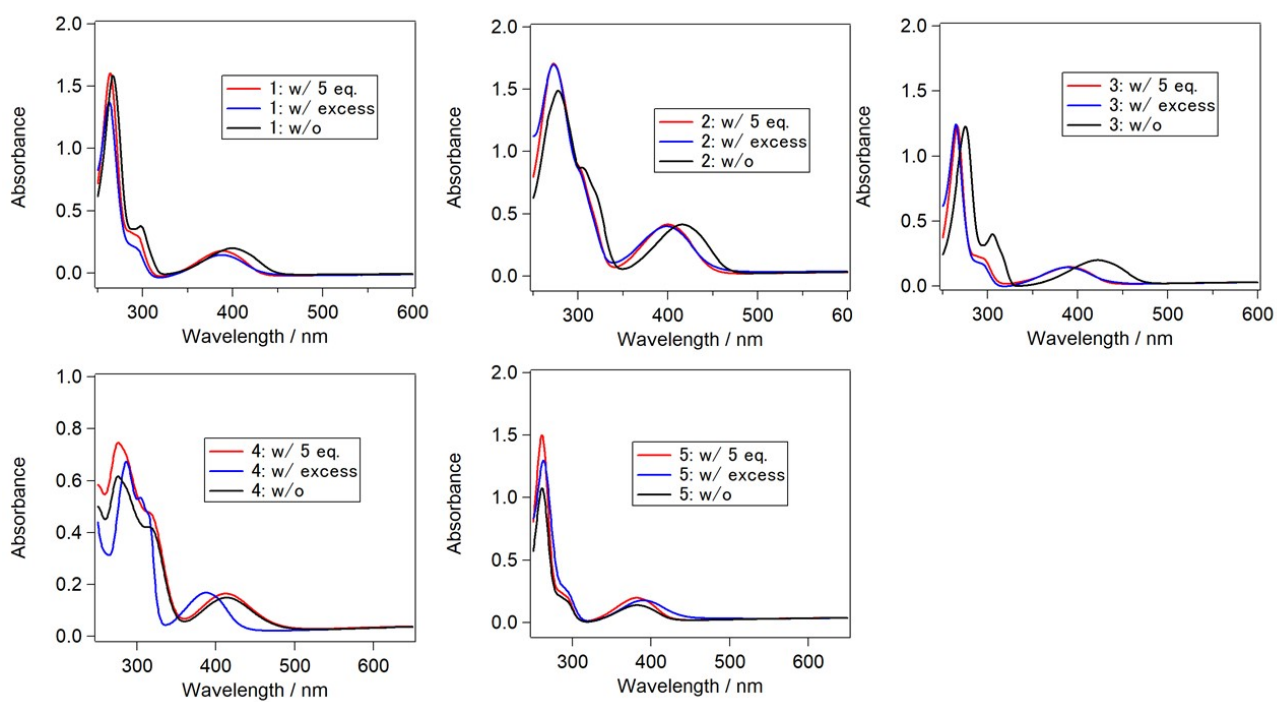

**Figure S4-1.** Absorption spectral changes of compounds 1–5 (see inset annotations) in  $\text{CHCl}_3$  without trifluoroacetic acid (TFA) (black lines) and with 5 equiv TFA (red lines) and excess TFA (blue lines).

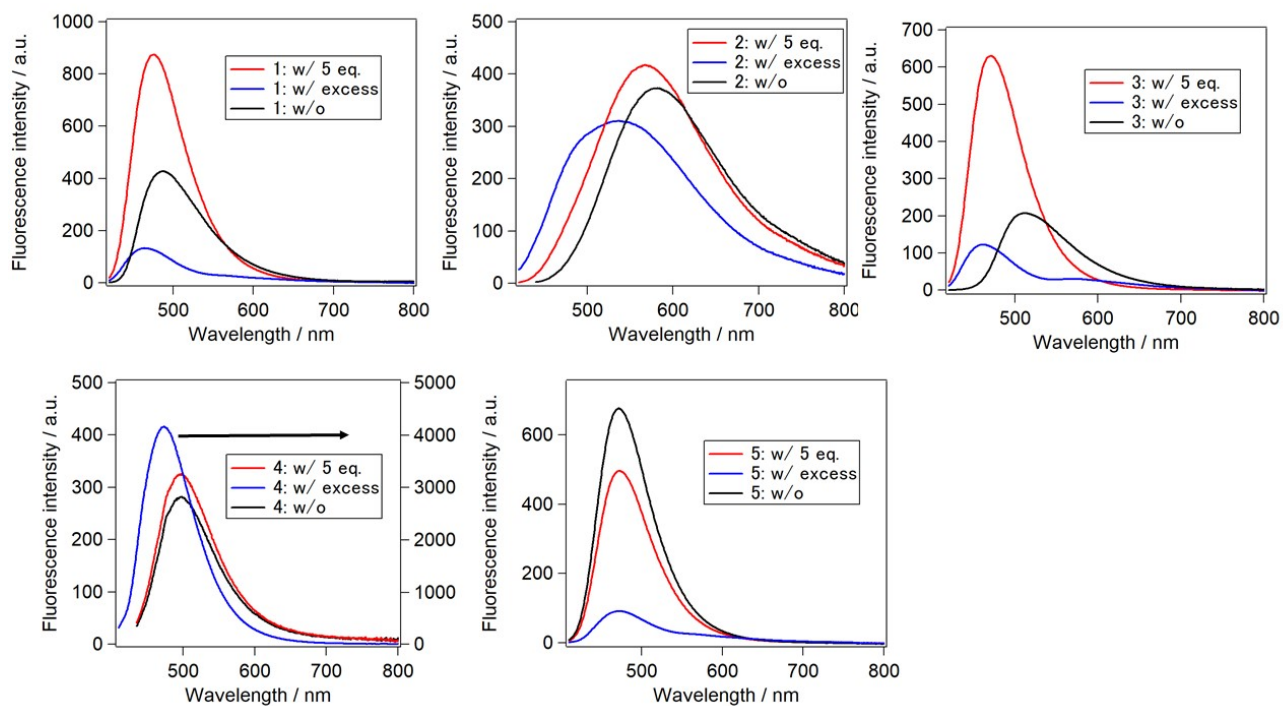

**Figure S4-2.** Fluorescence spectral changes of compounds 1–5 (see inset annotations) in  $\text{CHCl}_3$  without TFA (black lines) and with 5 equiv TFA (red lines) and excess TFA (blue lines).

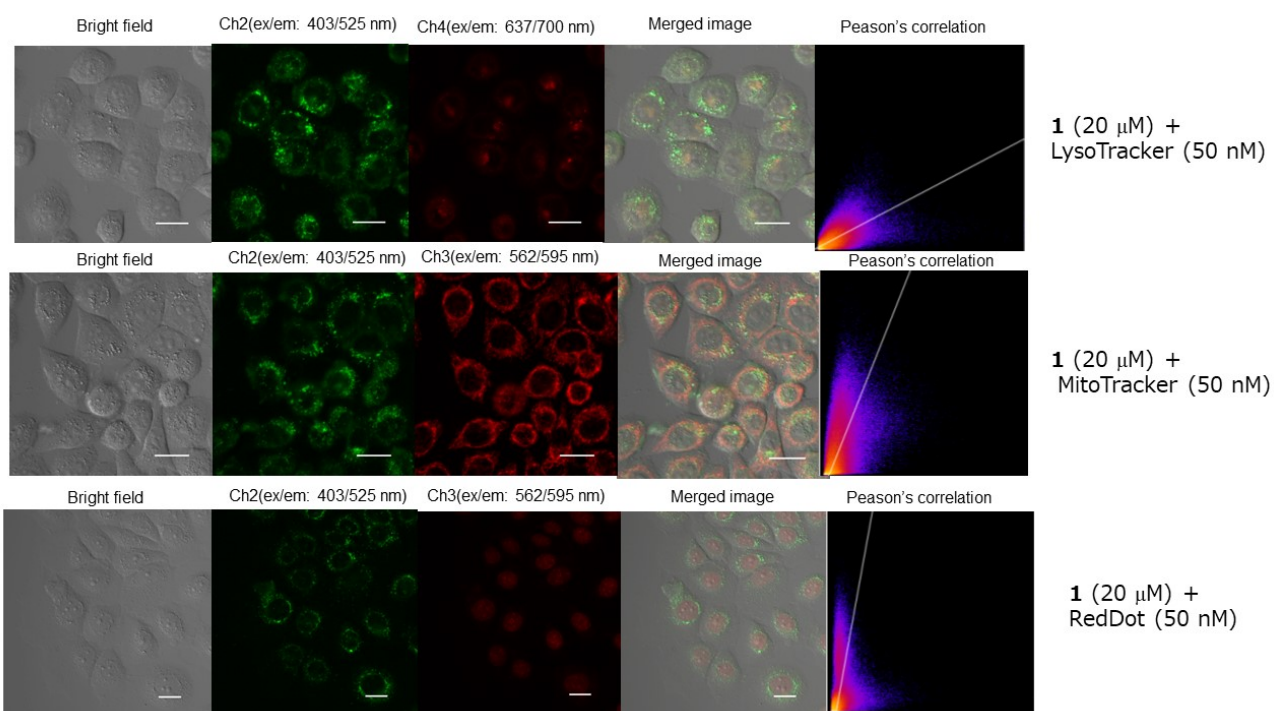

**Figure S5.** Confocal fluorescent microscopy images. Each panel represents bright field (left), fluorescence images obtained using Ch. 2, 3, or 4 (indicated at the top of the panel), as well as merged bright field and fluorescent images, and Pearson's correlation maps (right). Top, middle, and bottom lines indicate images treated with compound **1** and LysoTracker, MitoTracker, and RedDot, respectively. Scale bars indicate 20  $\mu$ m.

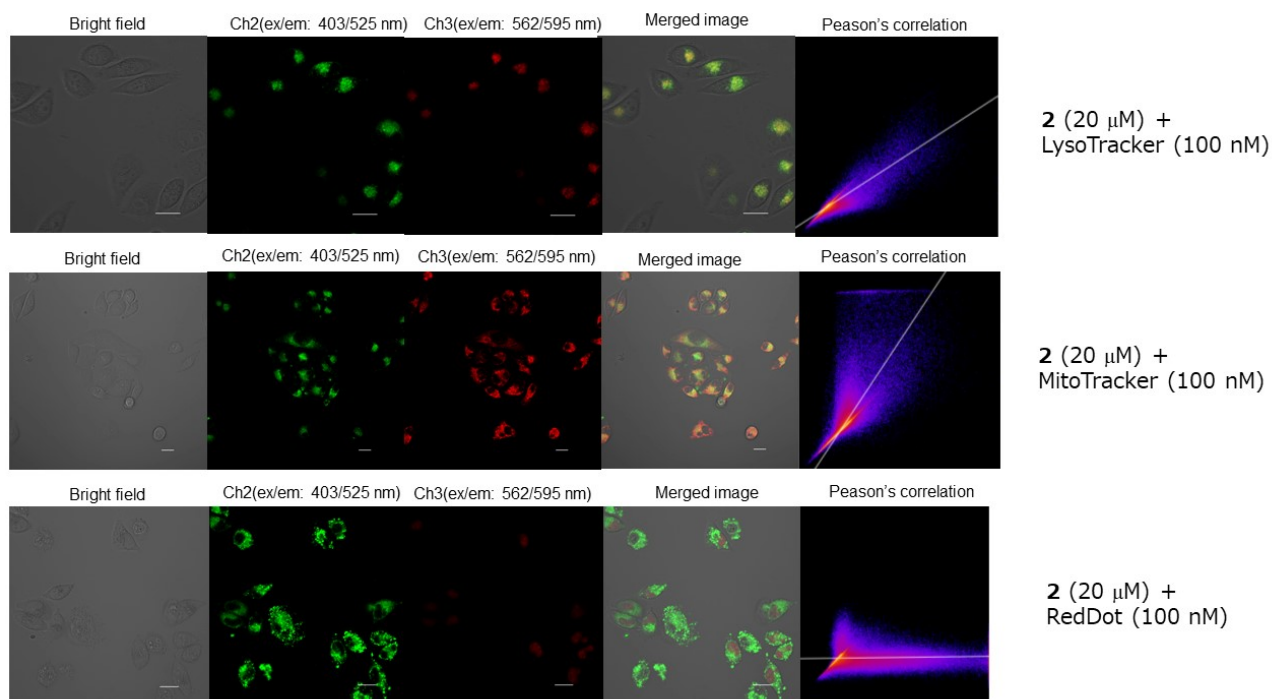

**Figure S6.** Confocal fluorescent microscopy images. Each panel show bright field (left), fluorescence images obtained using Ch. 2 or 3 (indicated at the top of the panel), as well as merged bright field and fluorescent images, and Pearson's correlation maps (right). Top, middle, and bottom lines indicate images treated with compound **2** and LysoTracker, MitoTracker, and RedDot, respectively. Scale bars indicate 20  $\mu$ m.

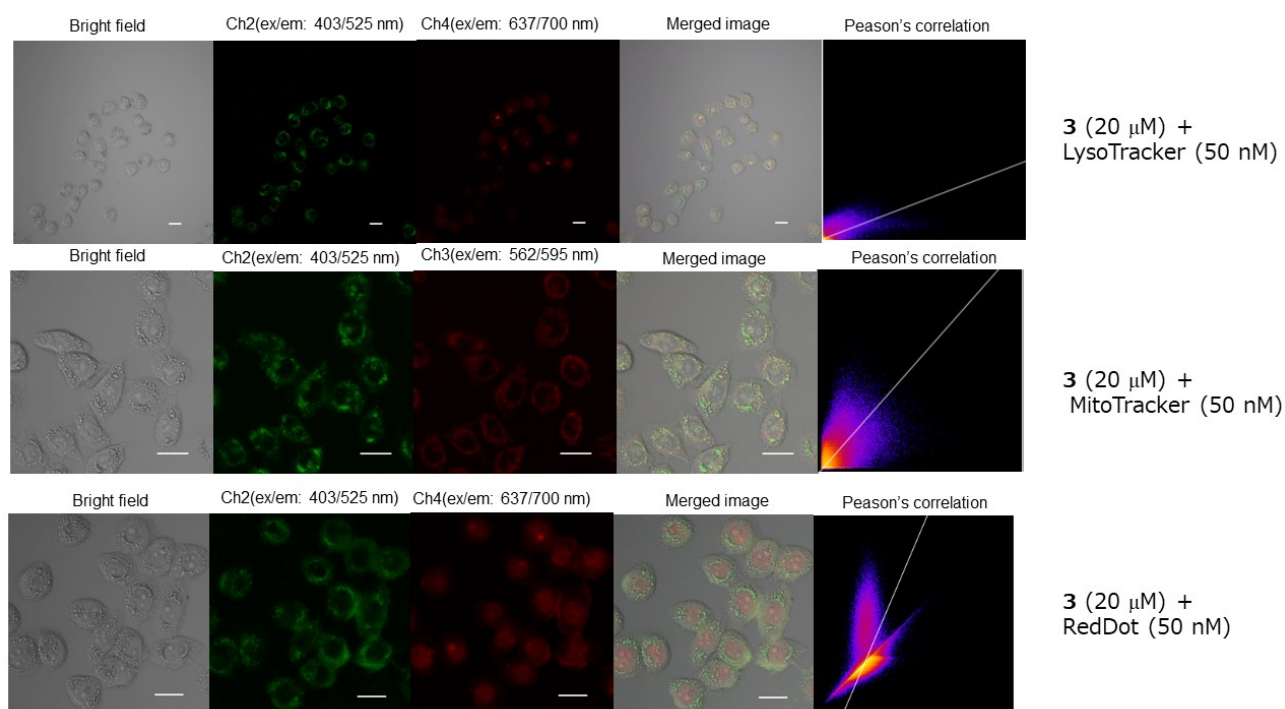

**Figure S7.** Confocal fluorescent microscopy images. The panels represent bright field (left), fluorescence images obtained using Ch. 2, 3, or 4 (indicated at the top of the panel), as well as merged bright field and fluorescent images, and Pearson's correlation maps (right). Top, middle, and bottom lines indicate images treated with compound **3** and LysoTracker, MitoTracker, and RedDot, respectively. Scale bars indicate 20 μm.

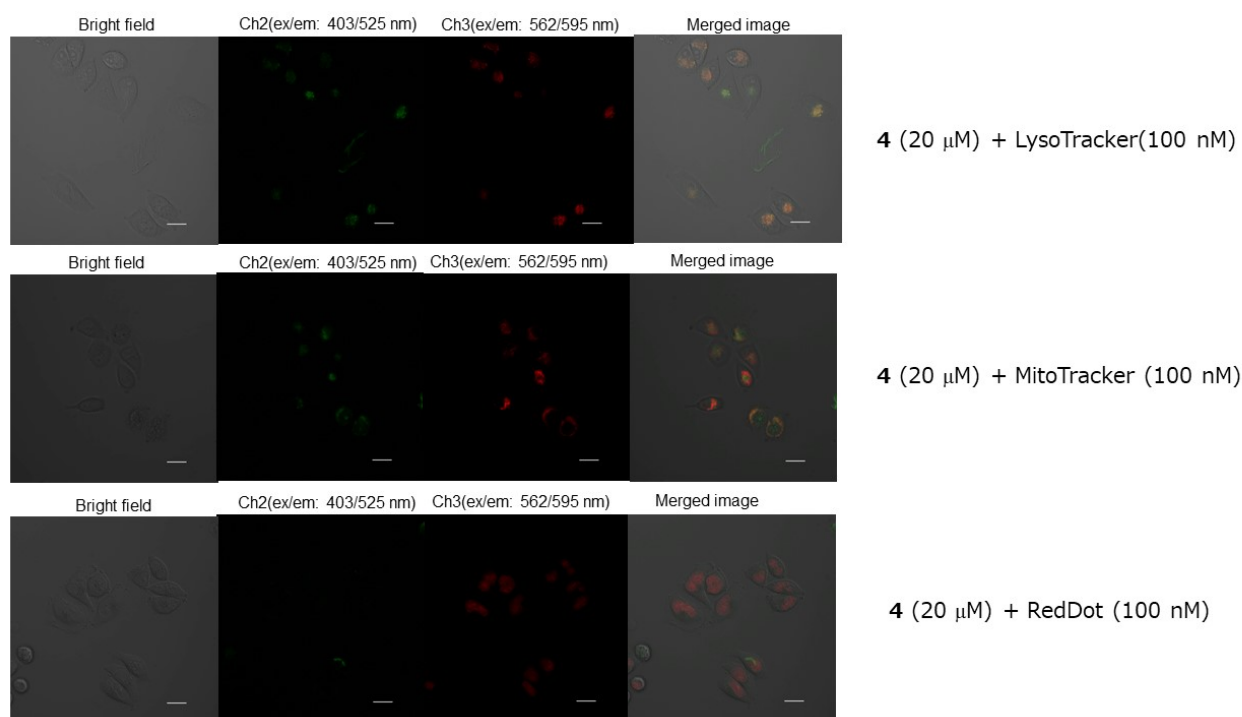

**Figure S8.** Confocal fluorescent microscopy images. The panels represent bright field (left) and fluorescence images obtained using Ch. 2 or 3 (indicated at the top of the panel), as well as merged bright field and fluorescent images. Top, middle, and bottom lines indicate images treated with compound **4** and LysoTracker, MitoTracker, and RedDot, respectively. Scale bars indicate 20  $\mu$ m.

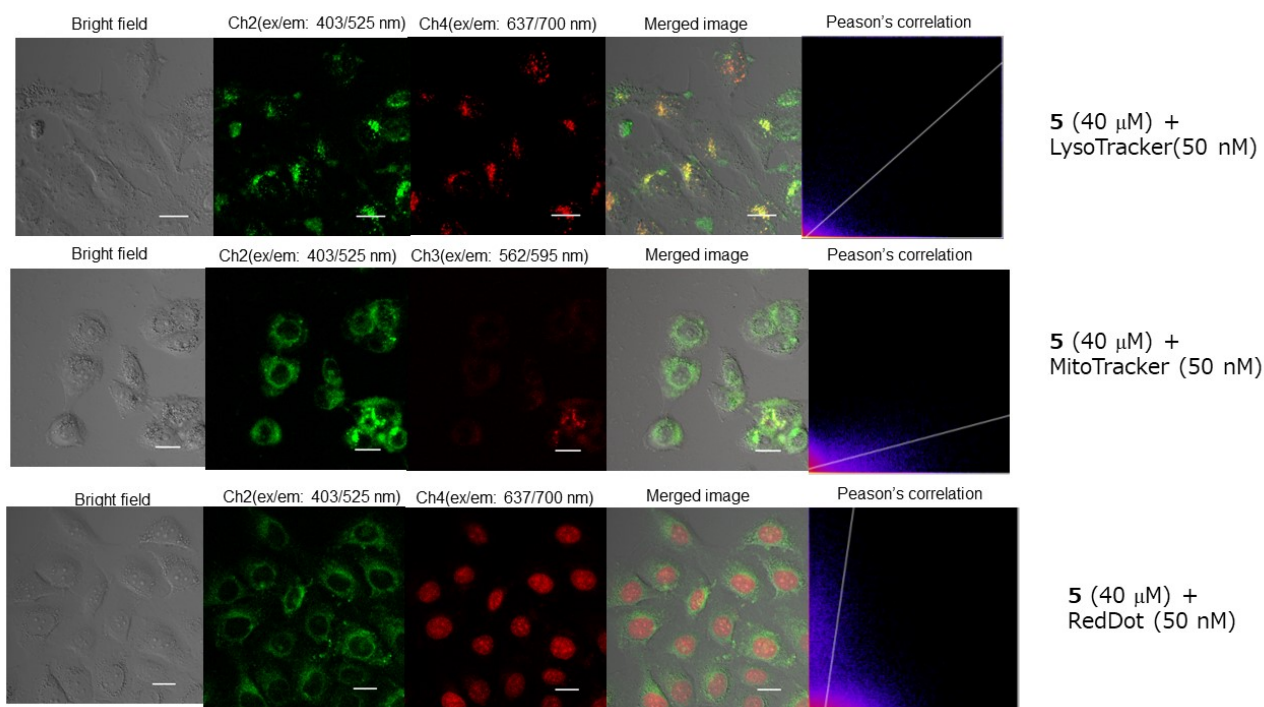

**Figure S9.** Confocal fluorescent microscopy images. Each panel shows a bright field (left), fluorescence image obtained using Ch. 2, 3, or 4 (indicated at the top of the panel), as well as a merged image of the bright field and fluorescent images, and Pearson's correlation maps (right). Top, middle, and bottom lines indicate images treated with compound **5** and LysoTracker, MitoTracker, and RedDot, respectively. Scale bars indicate 20 μm.

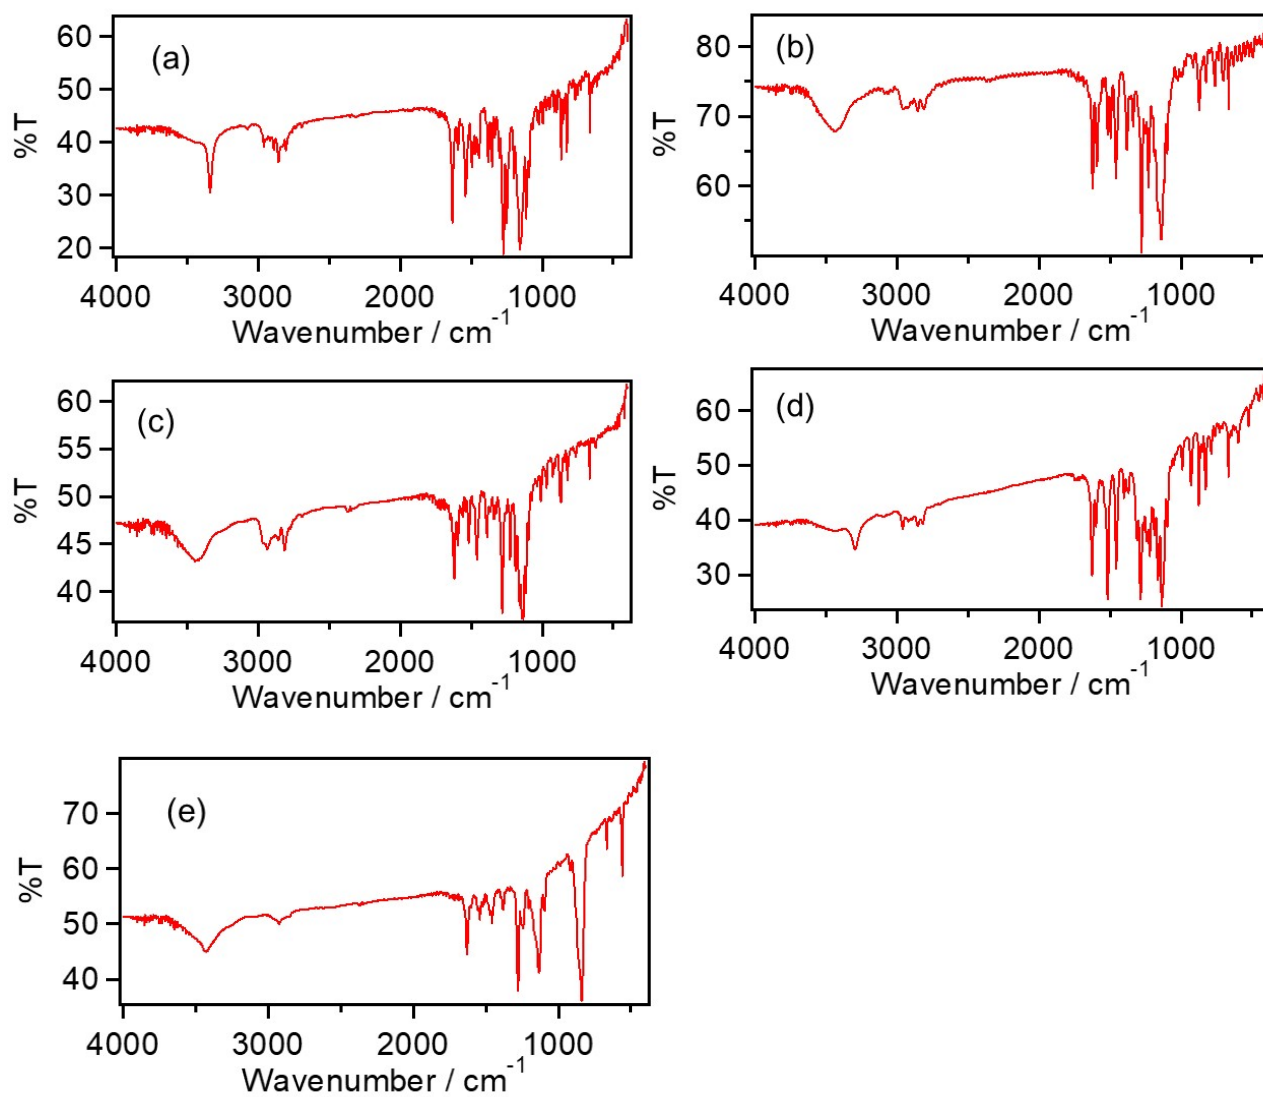

**Figure S10.** IR spectra of **1** (a), **2** (b), **3** (c), **4** (d), and **5** (e) in KBr.



<sup>1</sup>H-NMR spectrum of **1** (600 MHz, CDCl<sub>3</sub>)

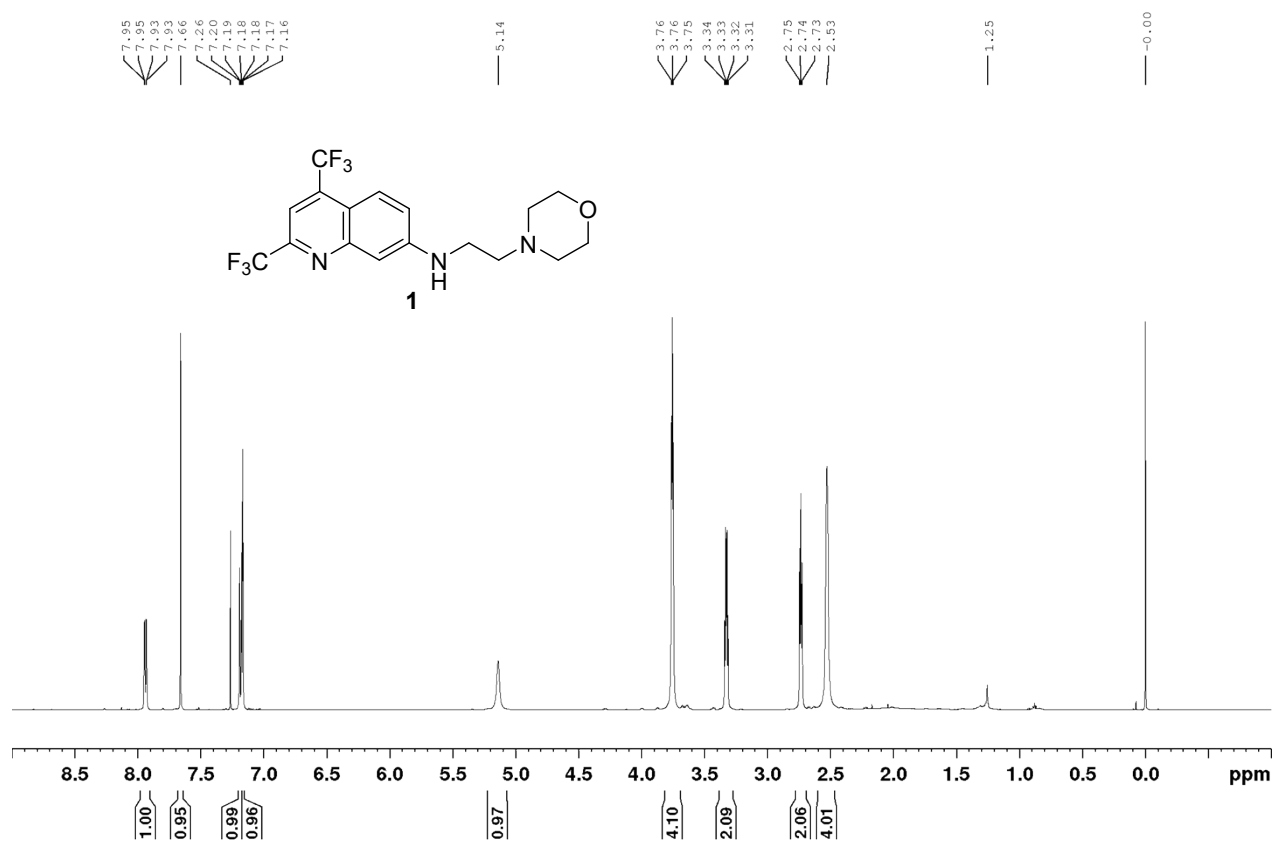

<sup>13</sup>C-NMR spectrum of **1** (151 MHz, CDCl<sub>3</sub>)

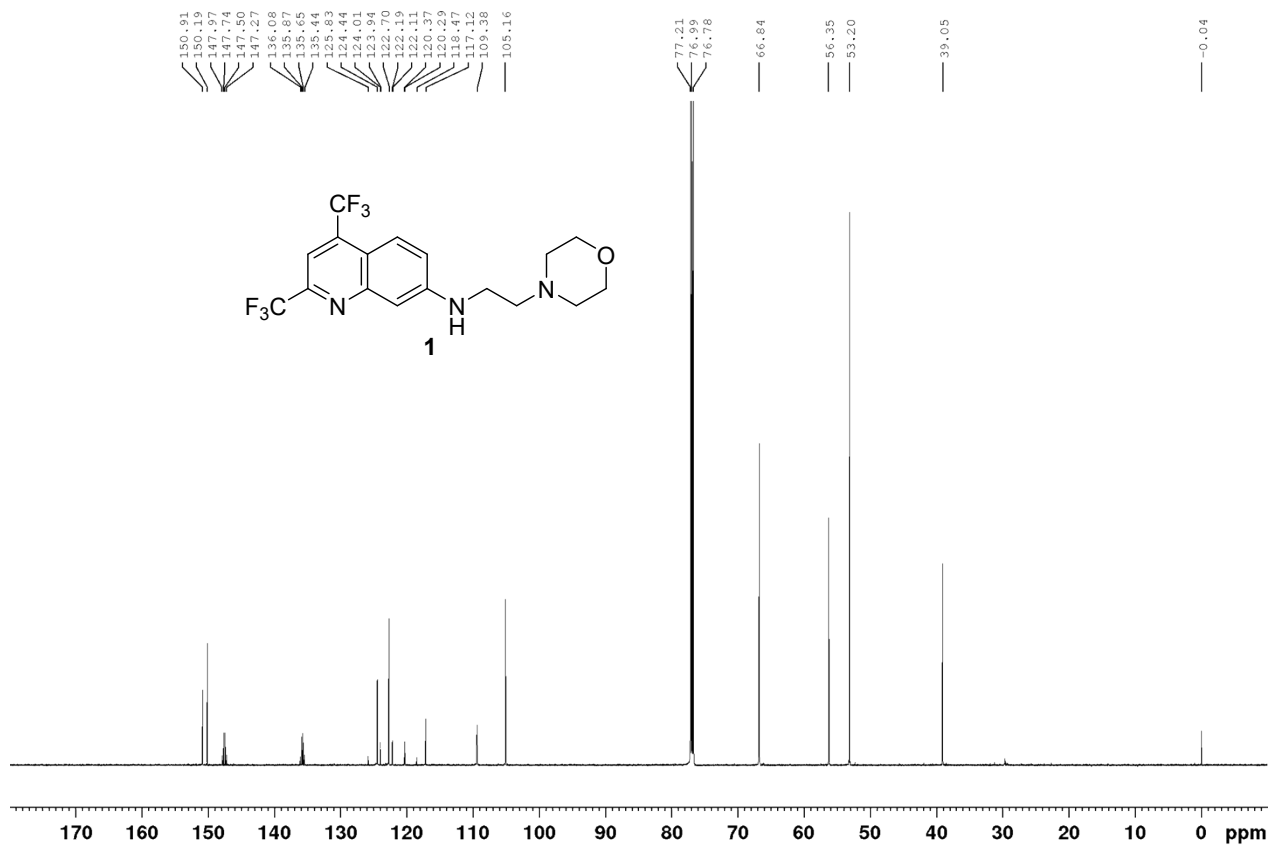

<sup>1</sup>H-NMR spectrum of **2** (600 MHz, CDCl<sub>3</sub>)

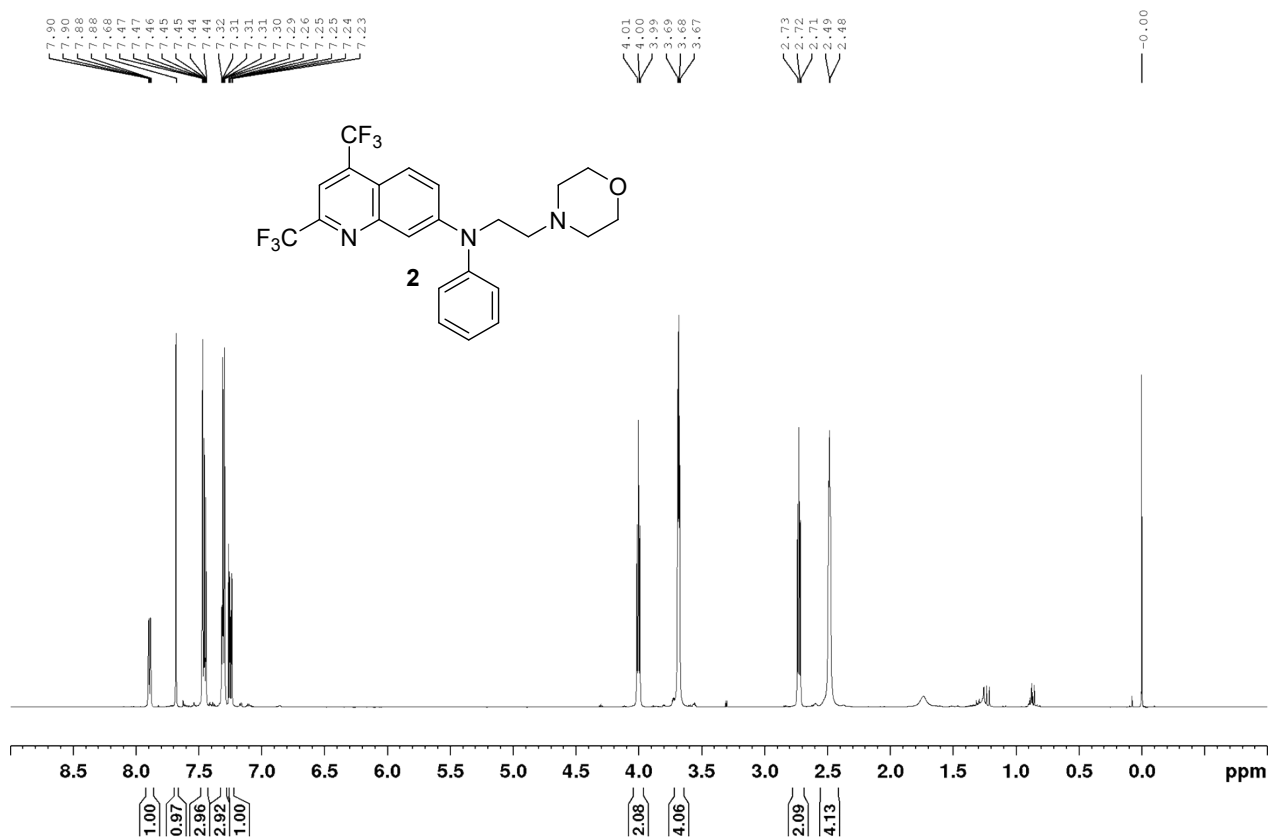

<sup>13</sup>C-NMR spectrum of **2** (151 MHz, CDCl<sub>3</sub>)

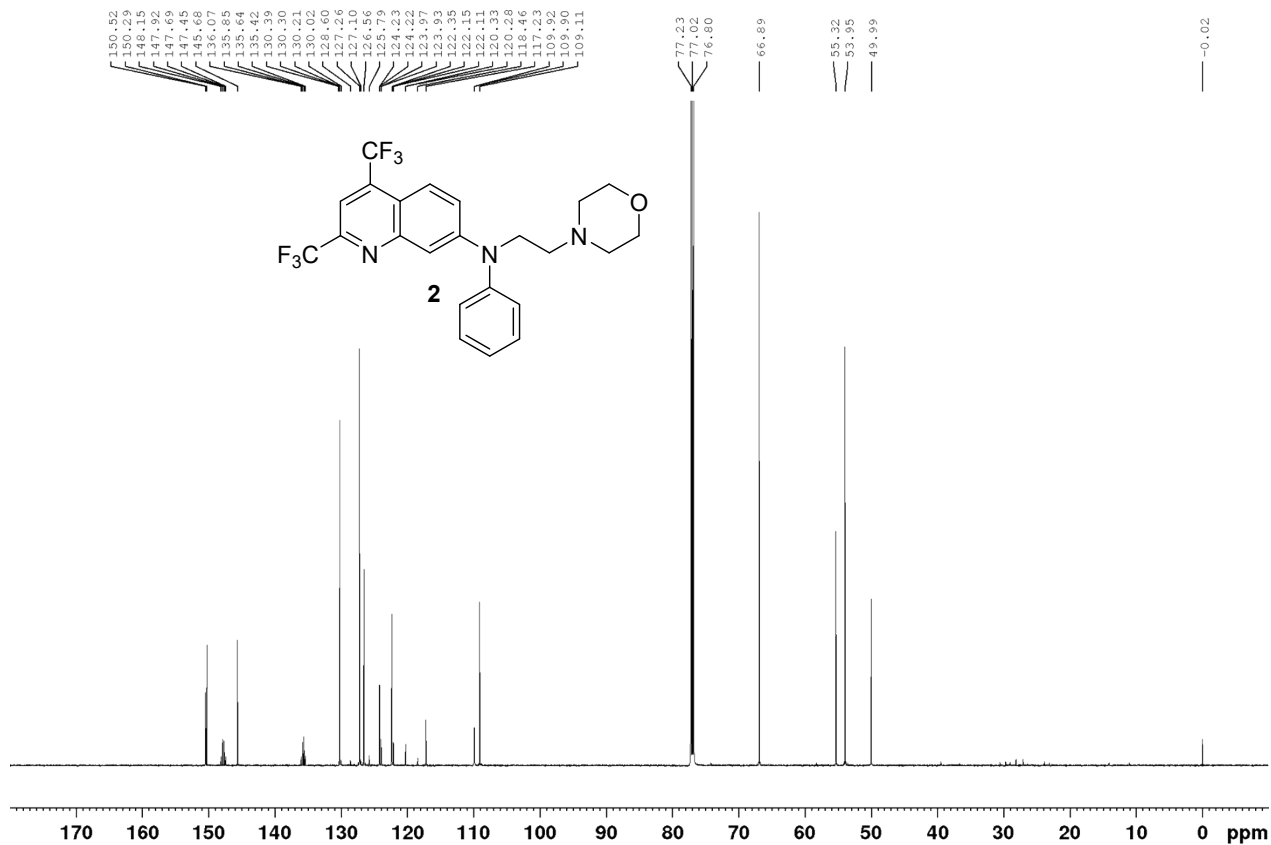

<sup>1</sup>H-NMR spectrum of **3** (600 MHz, CDCl<sub>3</sub>)

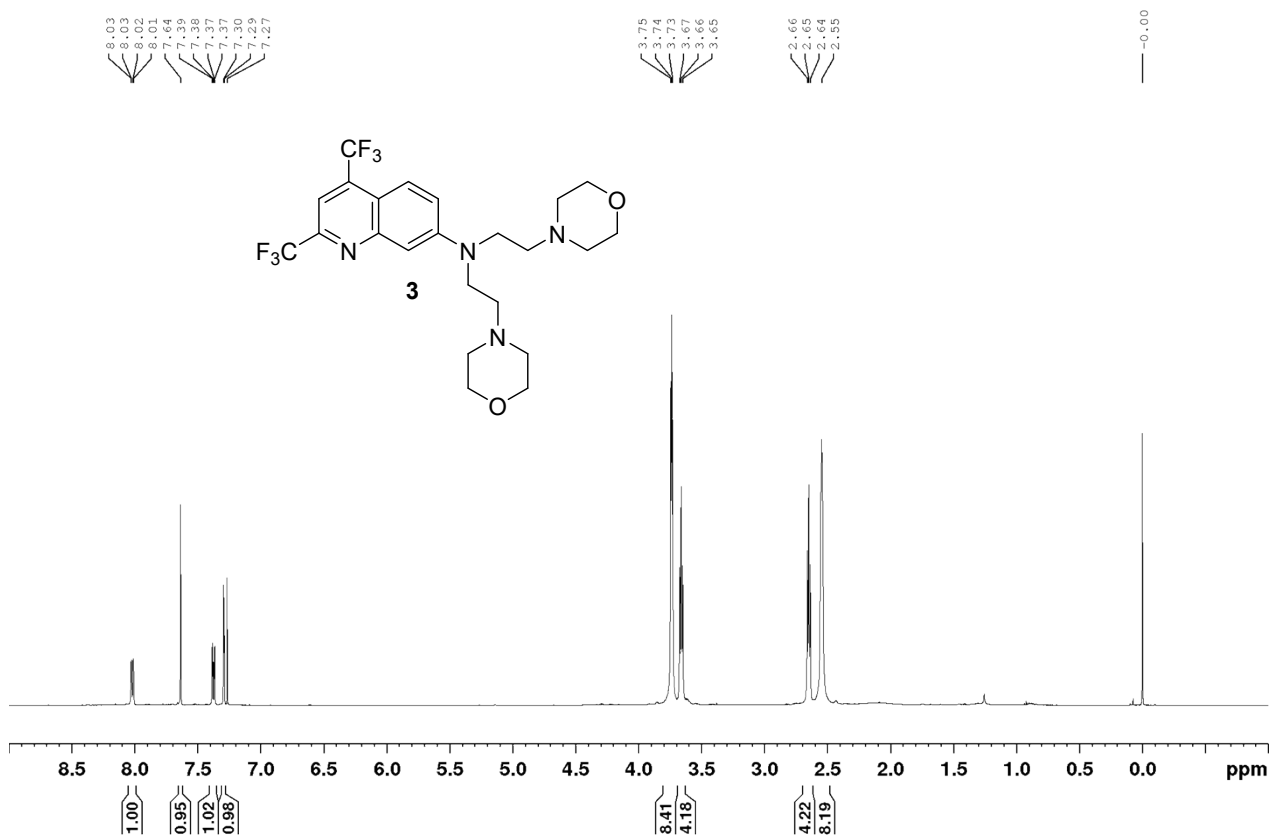

<sup>13</sup>C-NMR spectrum of **3** (151 MHz, CDCl<sub>3</sub>)

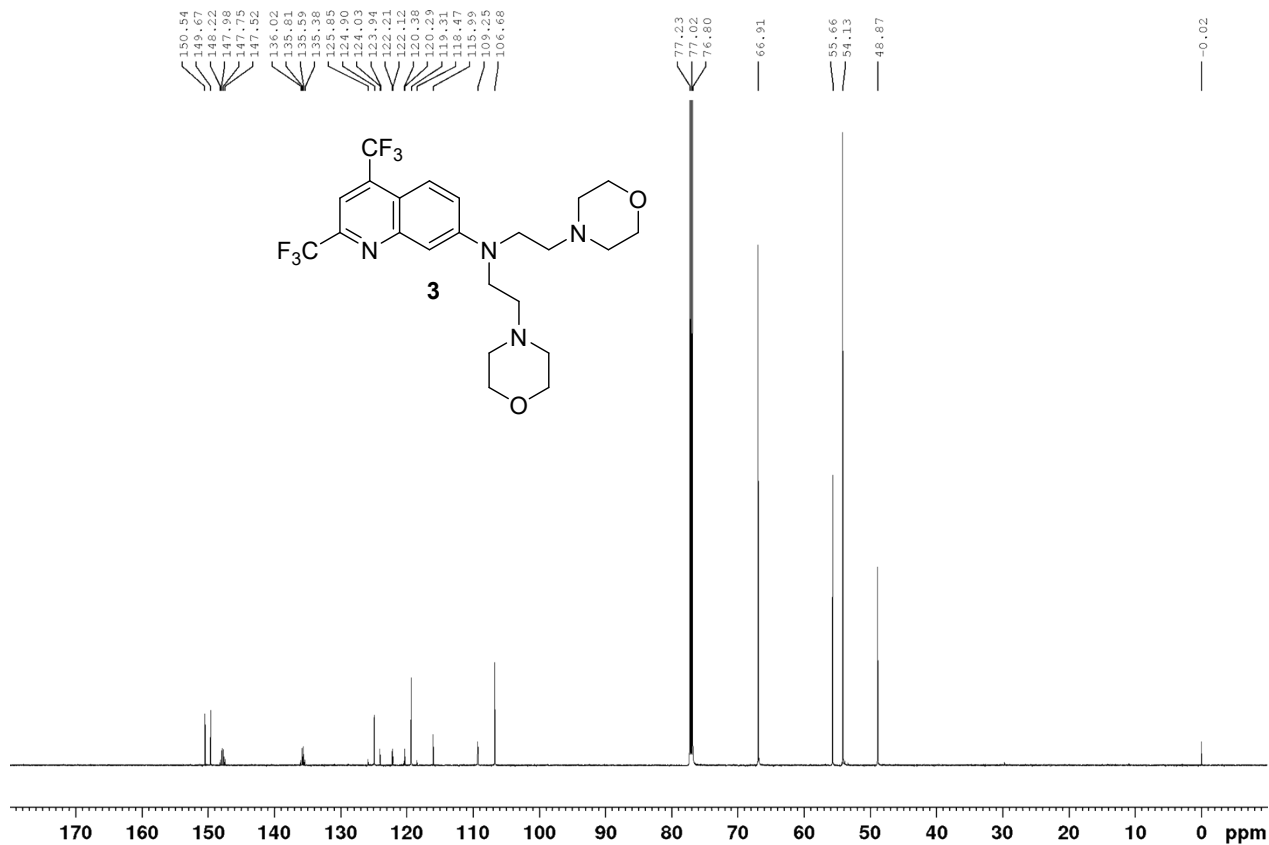

<sup>1</sup>H-NMR spectrum of **4** (600 MHz, CDCl<sub>3</sub>)

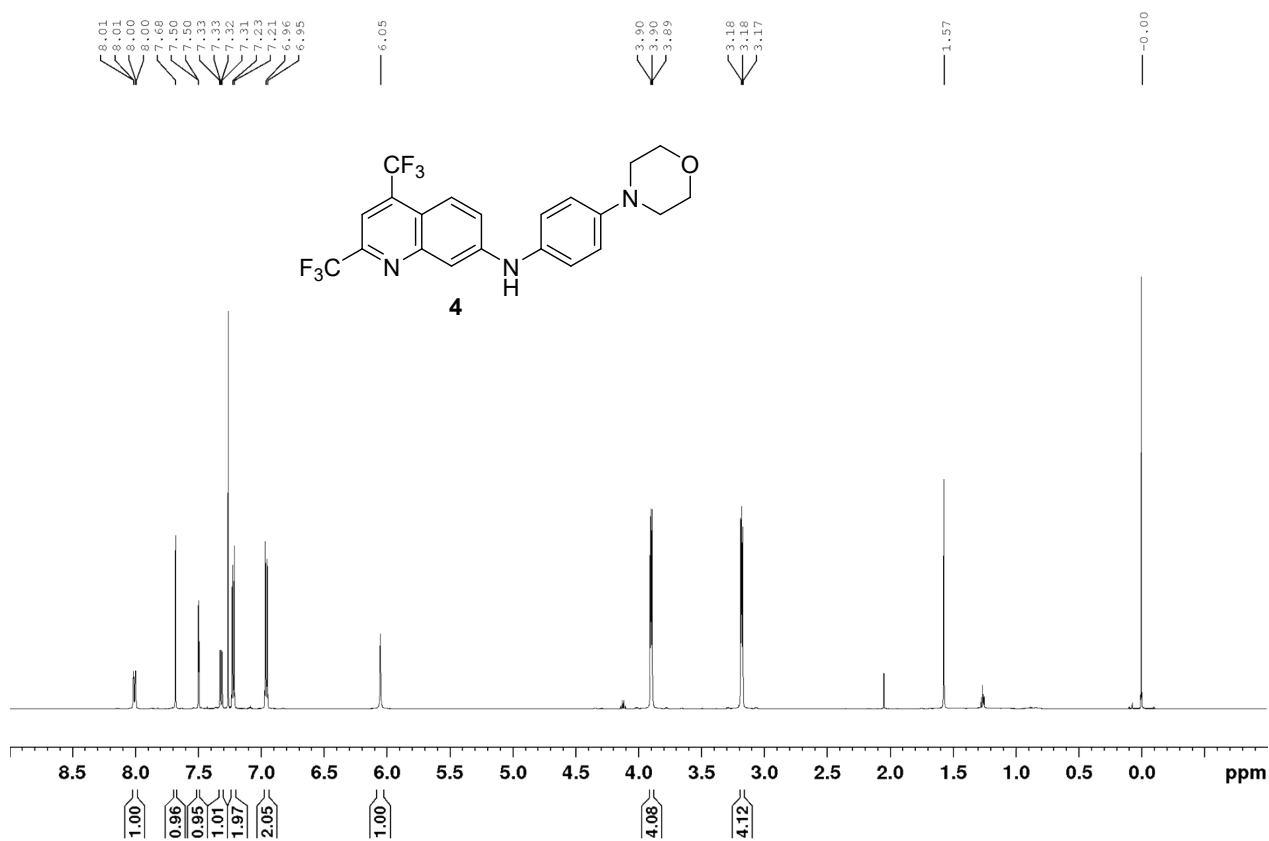

<sup>13</sup>C-NMR spectrum of **4** (151 MHz, CDCl<sub>3</sub>)

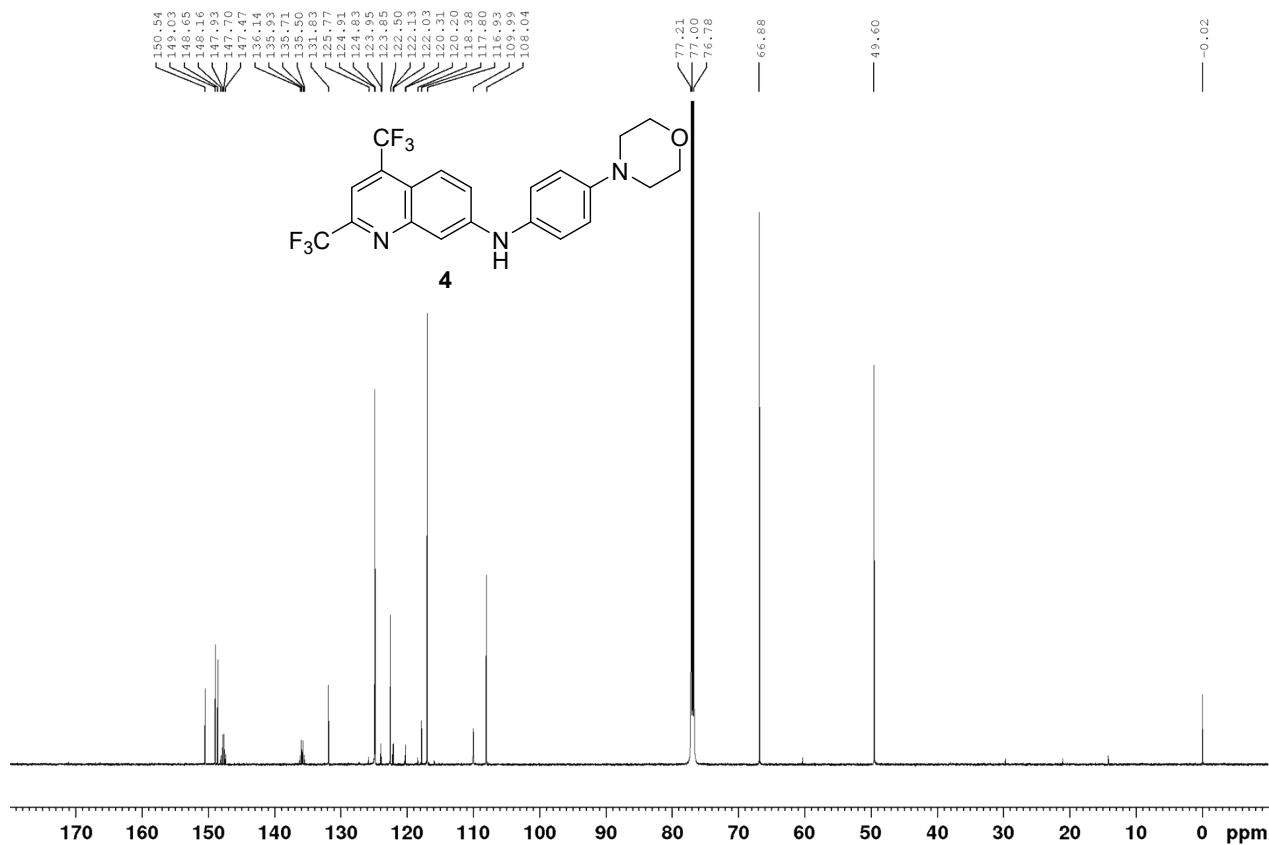

<sup>1</sup>H-NMR spectrum of **5** (600 MHz, MeOD)

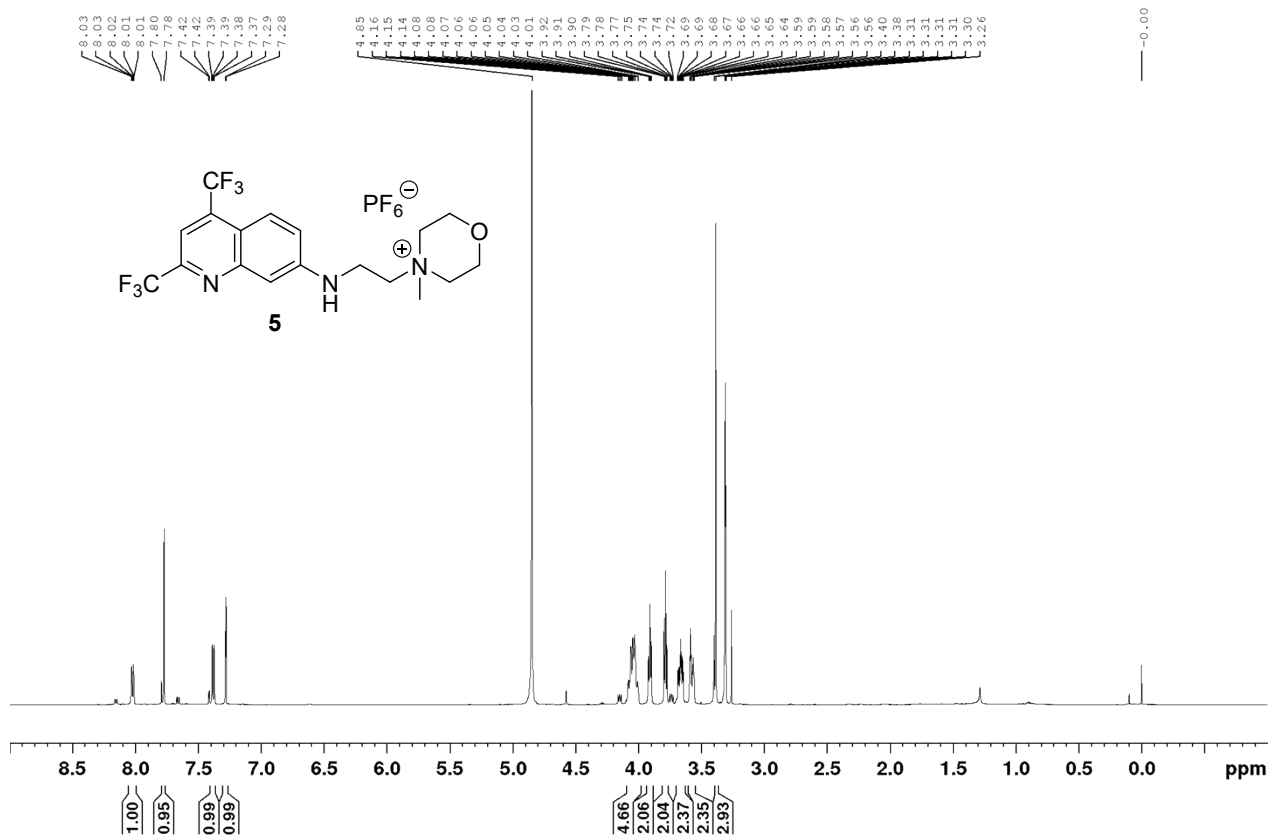

<sup>13</sup>C-NMR spectrum of **5** (151 MHz, MeOD)

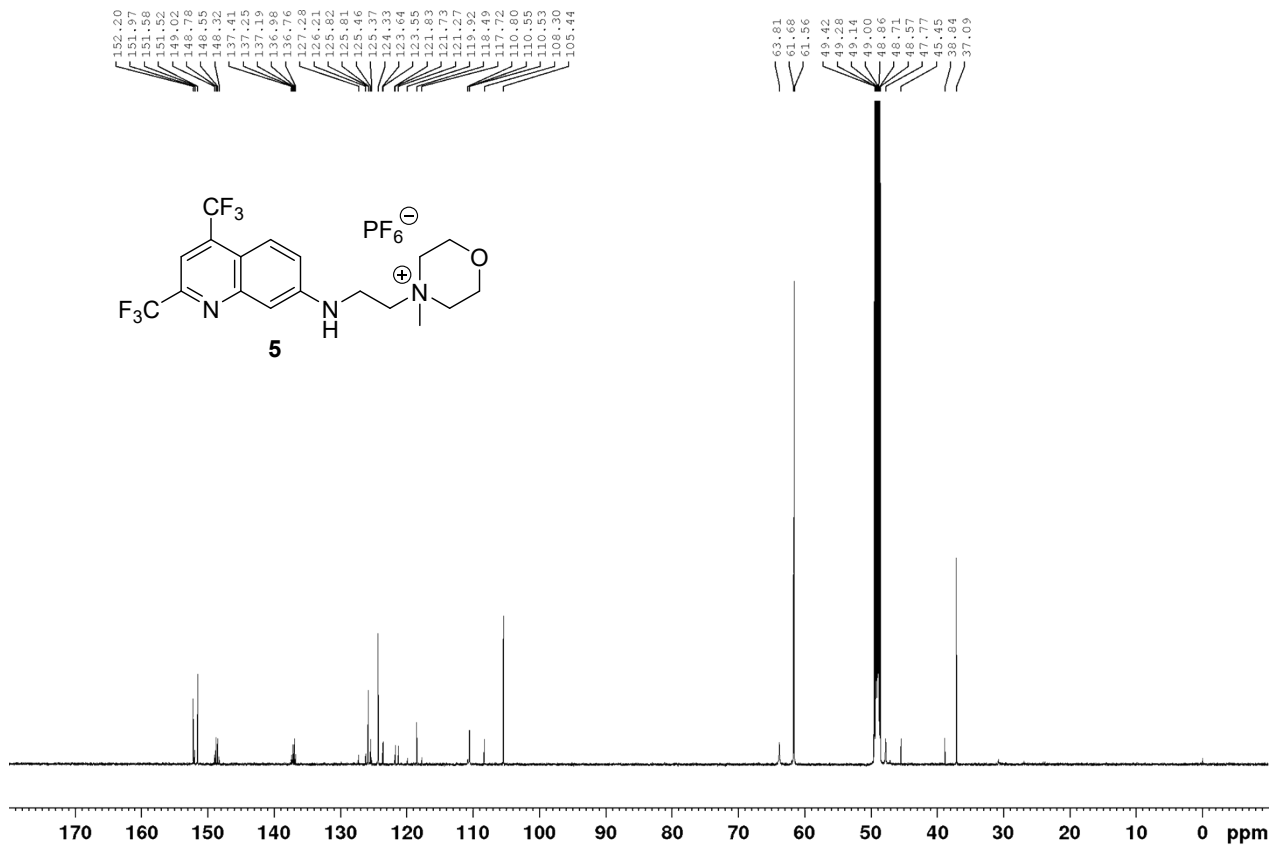

Supplement: d2ob00546h1.pdf [file d2ob00546h1.pdf]
